# Supplementary material
Source: PubMed Central journal article supplement (PMC9014369)
Supplement: NIHMS1792066-supplement-Supplemental_material.pdf [file NIHMS1792066-supplement-Supplemental_material.pdf]

# Supplemental Material

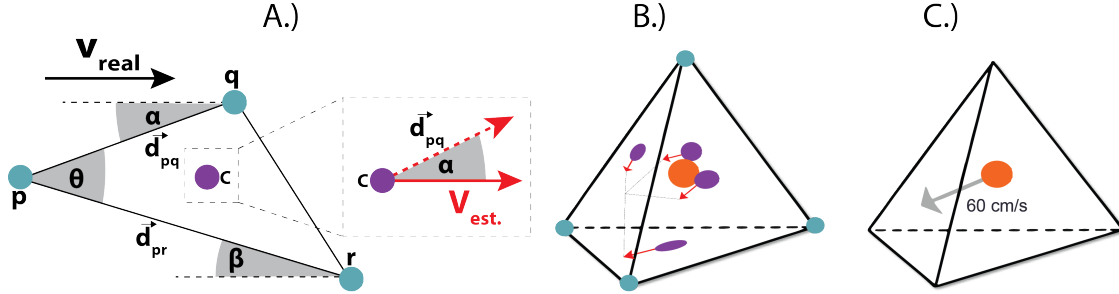

**Fig. 1.** Estimation of the 3D CV vector via triangulation and 3D superposition. A.) Parameterization of each face of the tetrahedra for the purposes of triangulation. INSET: Representing the vector at the center of the triangle. B.) Superposition of each triangle's 2D CV vector. C.) Visualization of the 3D CV vector.

**Implementing equations #1 - #6 guided by Figure 1:** The node that see the activation front earliest are denoted as  $\mathbf{p}$  (on a triangle by triangle basis), and the second and third nodes are denoted  $\mathbf{q}$  and  $\mathbf{r}$ . The center of the triangle is identified with a  $\mathbf{c}$ .  $\mathbf{V}_{real}$  indicates the directionality of the activation front and  $\mathbf{V}_{est}$  is the estimated speed ( $V_{Mag.}$ ) and directionality of that same activation front.  $\vec{d}_{pq}$  and  $\vec{d}_{pr}$  denote the vectors defining the edges of the triangle between  $\mathbf{p}$  and the following edges  $\mathbf{q}$  and  $\mathbf{r}$ .  $\alpha$  and  $\beta$  denote the angle of the incident wavefront on the edge between the respective node and  $\mathbf{p}$ .  $t_{pq}$  and  $t_{pr}$  are the differences in activation times measured at the respective nodes.

$\theta$  in Eq.#1 is defined as the angle at node  $\mathbf{p}$  and is calculated using the edge lengths of all three edges via the law of cosines.

$$\theta = \arccos \left( \frac{\|\vec{d}_{pq}\|^2 + \|\vec{d}_{pr}\|^2 - \|\vec{d}_{qr}\|^2}{2 \cdot \|\vec{d}_{pq}\| \cdot \|\vec{d}_{pr}\|} \right) \quad (1)$$

Using  $\theta$ , relative differences in activation times, and edge lengths, we can then calculate the orientation of the wavefront relative to one of the triangular edges, specifically  $\vec{d}_{pq}$  using Eq.#2.

$$\alpha = \arctan \left( \frac{t_{pr} \cdot \|\vec{d}_{pq}\| - \cos \theta}{t_{pq} \cdot \|\vec{d}_{pq}\| \sin \theta} \right) \quad (2)$$

Theta is related to  $\alpha$  and  $\beta$  via Eq.#3.  $\alpha$  and  $\beta$  describe the orientation of the activation front relative to one of the edges of the triangle.

$$\cos \beta = \cos(\theta - \alpha) \quad (3)$$

We may now determine the speed of that front using one of the edges connecting the earliest activated node (node  $\mathbf{p}$ ), which can be done with  $\vec{d}_{pq}$  and  $\alpha$  in Eq.#4 or  $\vec{d}_{pr}$  and  $\beta$  in Eq.#5.

$$V_{Mag.} = \frac{\|\vec{d}_{pq}\| \cdot \cos \alpha}{t_{pq}} \quad (4)$$

$$V_{Mag.} = \frac{\|\vec{d}_{pr}\| \cdot \cos \beta}{t_{pr}} \quad (5)$$

We use Eq.#6 to translate the estimated CV vector to the centroid of the triangle.

$$\vec{V}_{Est.} = \left( (V_{Mag.} \cdot \widehat{\vec{d}_{pq}}) \circ \begin{bmatrix} \cos \alpha & -\sin \alpha \\ \sin \alpha & \cos \alpha \end{bmatrix} \right) + \vec{d}_{pc} \quad (6)$$

, where  $\widehat{d_{pq}}$  is the unit vector of  $\vec{d}_{pq}$ .

Finally, once the 2D CV vector was computed for each face of the tetrahedral element, the face vectors were summed to produce the 3D CV vector using Eq.#7.

$$\vec{V}_{3D} = \vec{V}_1 + \vec{V}_2 + \vec{V}_3 + \vec{V}_4 \quad (7)$$
